# Supplementary material
Source: PubMed Central journal article supplement (PMC4150132)

eFigure 1. Relation of mean level of depressive symptoms to rate of global cognitive decline after adjustment for dementia related pathology

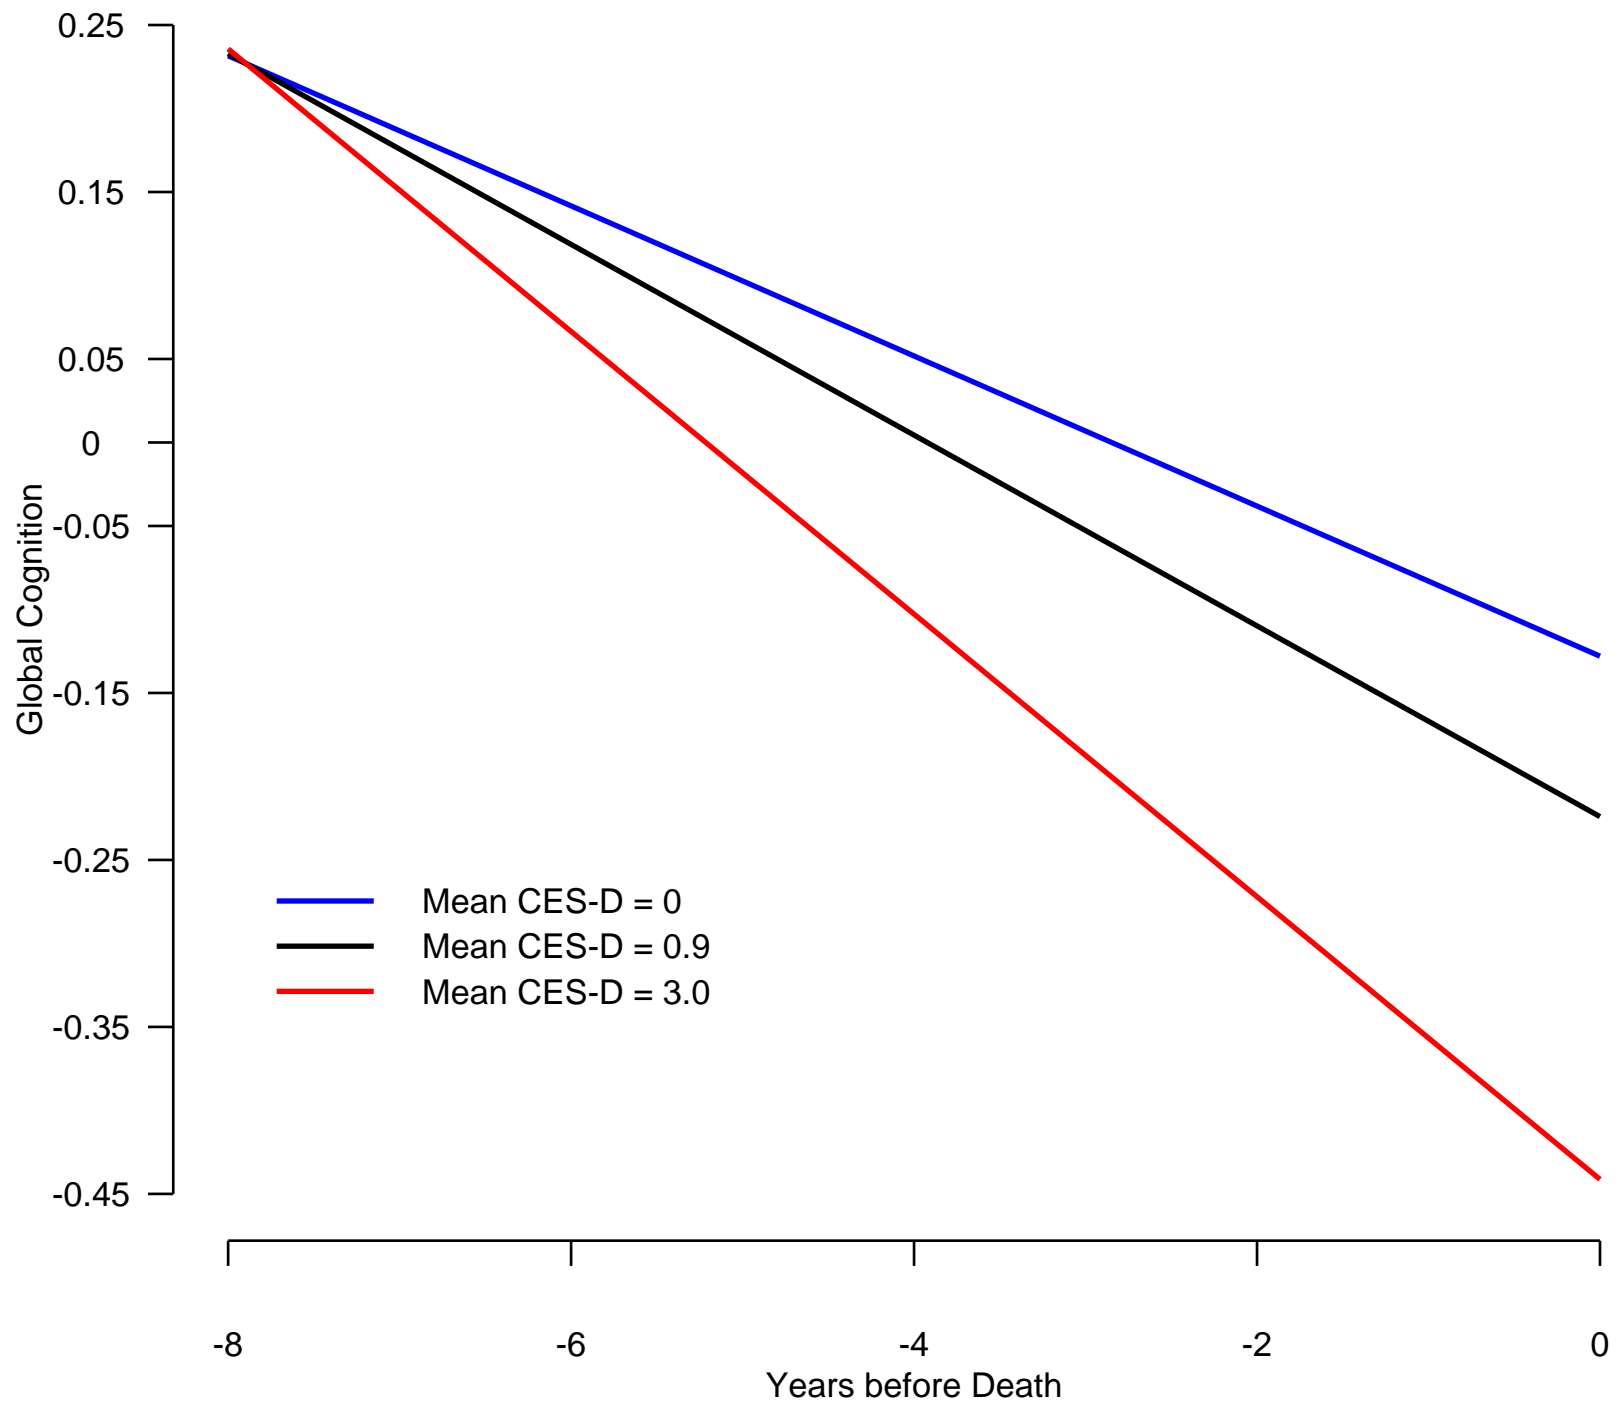

Supplement: supp_WNL.0000000000000715_Figure_e-1.pdf [file supp_WNL.0000000000000715_Figure_e-1.pdf]
